# Supplementary material for: Seasonal stratospheric ozone trends over 2000–2018 derived from several merged data sets
Source: Copernicus journal article supplement (doi:10.5194/acp-2019-1144), 2020-01-29
Supplement: Supplementary file 1 [file acp-2019-1144-supplement.pdf]

# Supporting Information for “Seasonal stratospheric ozone trends over 2000-2018 derived from several merged data sets”

Monika E. Szlag<sup>1</sup>, Viktoria F. Sofieva<sup>1</sup>, Doug Degenstein<sup>2</sup>, Chris Roth<sup>2</sup>, Sean Davis<sup>3</sup> and Lucien Froidevaux<sup>4</sup>

5 <sup>1</sup> Finnish Meteorological Institute, Helsinki, Finland

<sup>2</sup> University of Saskatchewan, Canada

<sup>3</sup> NOAA Earth System Research Laboratory Chemical Sciences Division, Boulder, CO, USA

<sup>4</sup> Jet Propulsion Laboratory, California Institute of Technology, Pasadena, California, USA

10 *Correspondence to:* Monika Szlag (monika.szlag@fmi.fi)

## Contents

### 1. Figure S1 to S4

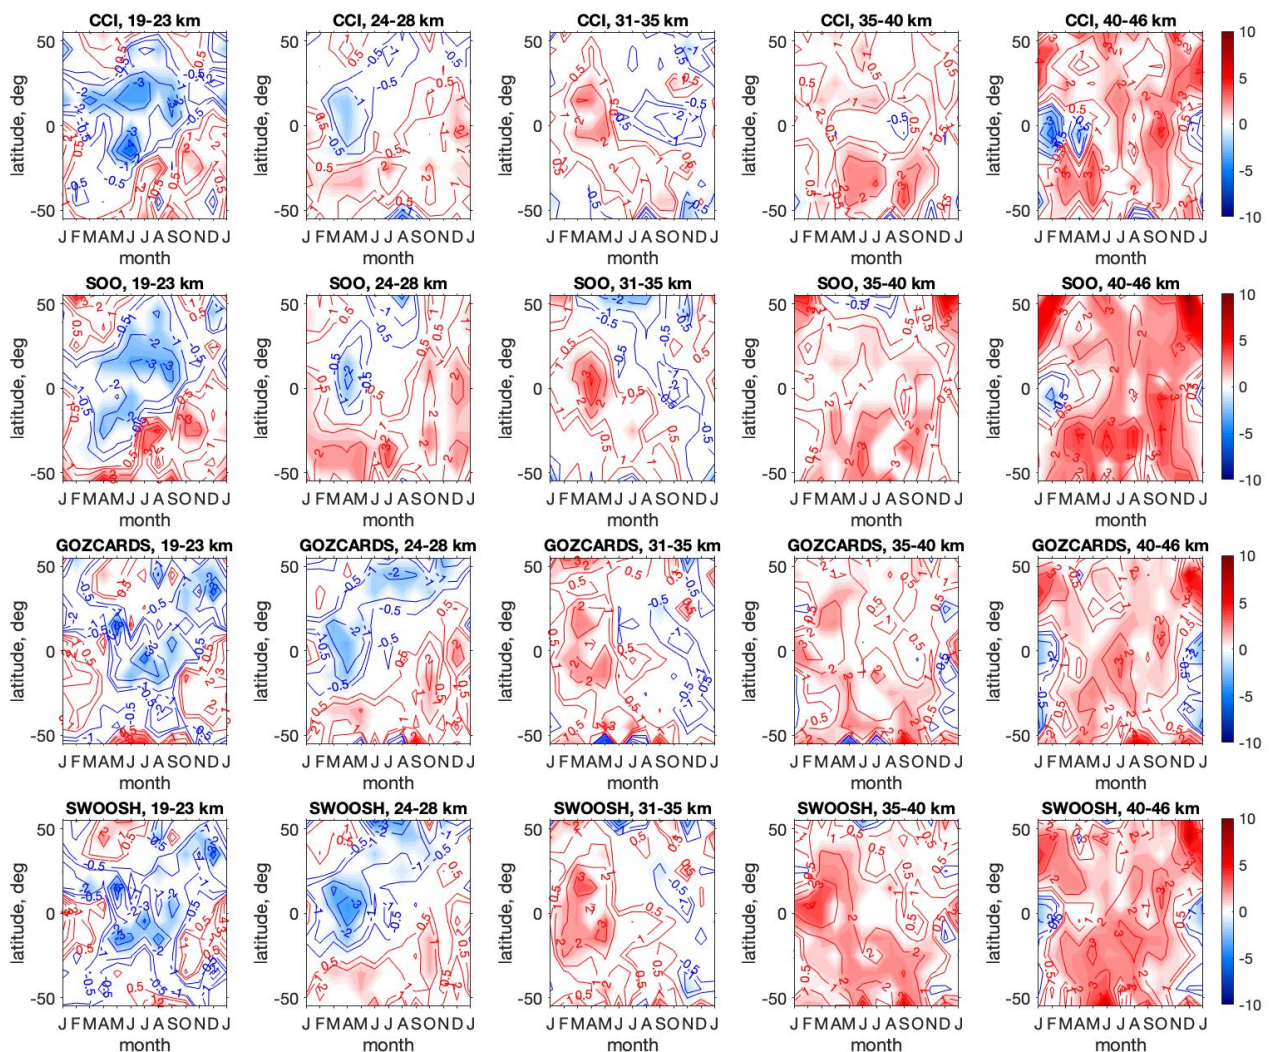

Figure S1. Latitude-months variation of linear trends in ozone for each of the merged data sets calculated over 2000-2018 for five selected altitude/pressure bands. The shading denotes trends that are significant at the 95% level.



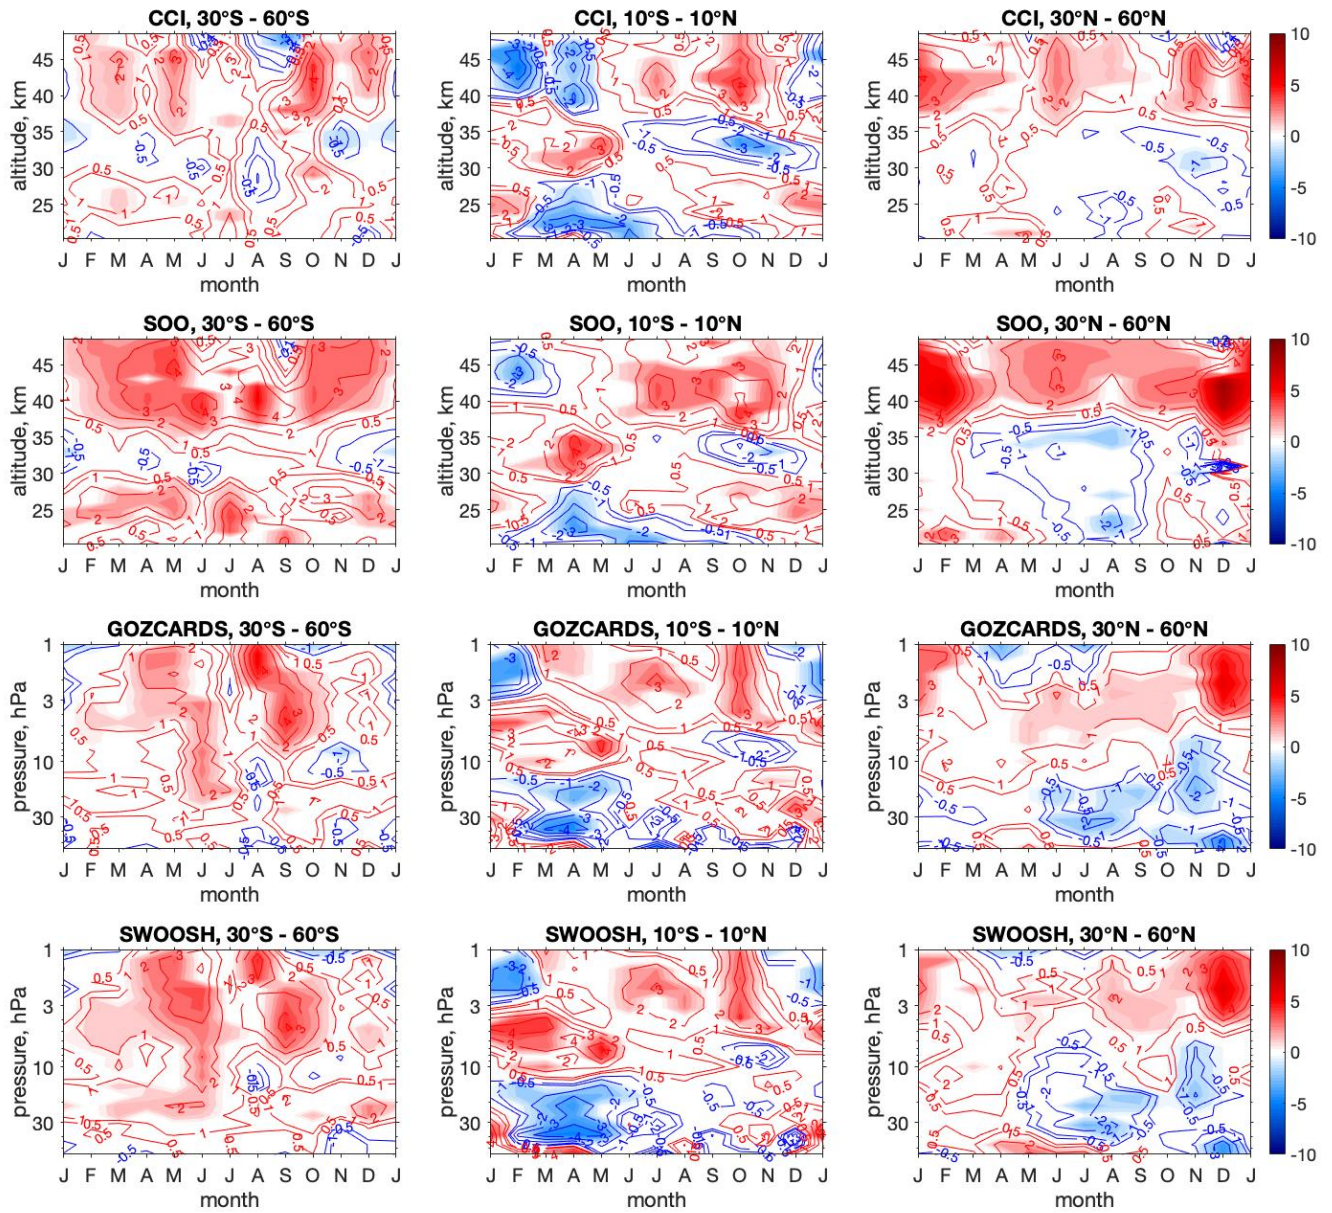

Figure S2. Altitude-months variation of linear trends in ozone for each of the merged data sets calculated over 2000-2016 for three selected latitudinal bands. Data are presented on their natural vertical coordinate: altitude grid for CCI and SOO and pressure grid for GOZCARDS and SWOOSH. The shading denotes trends that are significant at the 95% level.

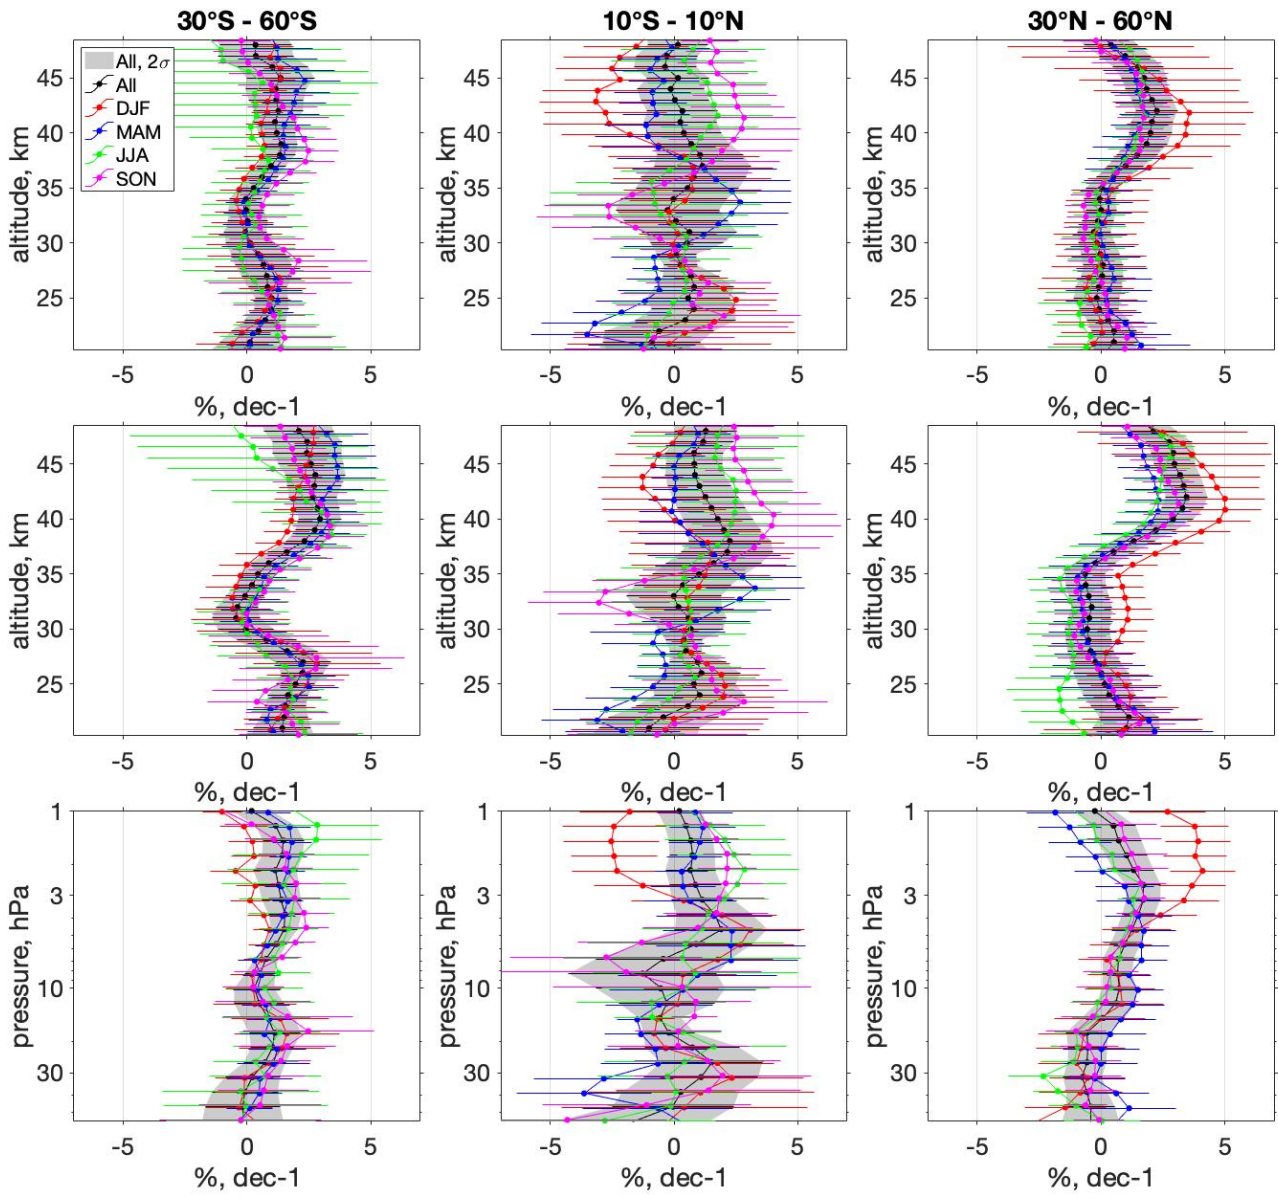

Figure S3. Vertical profiles of seasonal (red, blue, green, magenta) and yearly (black) ozone trends in 2000-2018 from CCI (top panels), SOO (middle panels) and GOZCARDS (bottom panels). The results are shown for three selected latitude bands. Error bars and shaded area (gray) are 2-sigma uncertainties.



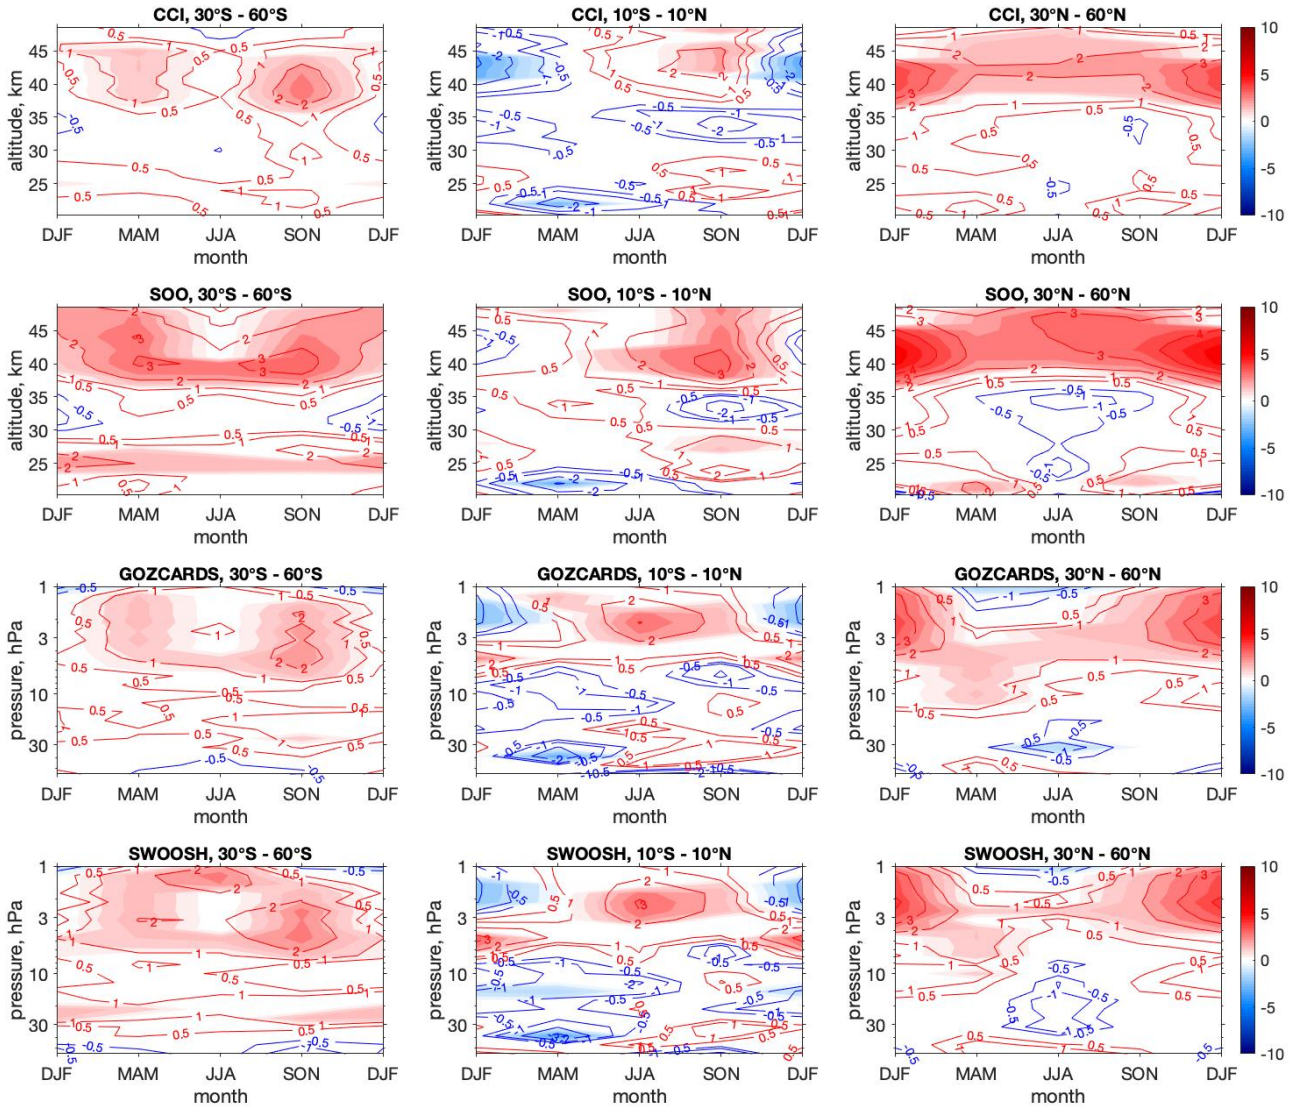

Figure S4. Altitude-seasons variation of linear trends in ozone for each of the merged data sets calculated over 2000-2018 for three selected latitudinal bands using method #2 (see description in the Manuscript). Data are presented on their natural vertical coordinate: altitude grid for CCI and SOO and pressure grid for GOZCARDS and SWOOSH. The shading denotes trends that are significant at the 95% level.
